# Modeling bacteria-based therapy in tumor spheroids

Pietro Mascheroni<sup>a</sup>, Michael Meyer-Hermann<sup>a,b,c,\*</sup>, Haralampos Hatzikirou<sup>a,\*</sup>

<sup>a</sup>*Braunschweig Integrated Centre of Systems Biology and Helmholtz Centre for Infection Research, Braunschweig, Germany.*

<sup>b</sup>*Centre for Individualized Infection Medicine, Hannover, Germany.*

<sup>c</sup>*Institute for Biochemistry, Biotechnology and Bioinformatics, Technische Universität Braunschweig.*

---

## Abstract

Tumor-targeting bacteria elicit anticancer effects by infiltrating hypoxic regions, releasing toxic agents and inducing immune responses. As the mechanisms of action of bacterial therapies are still to be completely elucidated, mathematical modeling could aid the understanding of the dynamical interactions between tumor cells and bacteria in different cancers. Here we propose a mathematical model for the anti-tumor activity of bacteria in tumor spheroids. We consider constant infusion and time-dependent administration of bacteria in the culture medium, and analyze the effects of bacterial chemotaxis and killing rate. We show that active bacterial migration towards tumor hypoxic regions is necessary for successful spheroid infiltration and that intermediate chemotaxis coefficients provide the smallest spheroid radii at the end of the treatment. We report on the impact of the killing rate on final spheroid composition, and highlight the emergence of spheroid size oscillations due to competing interactions between bacteria and tumor cells.

*Keywords:* Cancer, Bacterial therapy, Mixture theory, Chemotaxis, Space competition

---

\*Correspondence:  
mmh@theoretical-biology.de (M.M.H.);  
haralampos.hatzikirou@helmholtz-hzi.de (H.H.)

## 1 1. Introduction

2 Cancers display huge variability between different patients and even in  
3 the same patient. Nonetheless, cancer cells share a finite set of hallmarks  
4 such as sustained proliferation, invasion and metabolic reprogramming, which  
5 shape their behavior in solid tumors (Hanahan and Weinberg, 2011). Among  
6 other hallmarks, tumor cells are known to recruit new blood vessels to sus-  
7 tain their proliferation, in a process known as *tumor angiogenesis* (Folkman,  
8 1971). This neovasculature is generally altered in terms of architecture and  
9 morphology of the vessels, leading to poor perfusion of certain areas of the  
10 tumor (Carmeliet and Jain, 2000). Hypoxic regions are thus created and  
11 maintained during tumor development, concurring to the progression of can-  
12 cer cells towards malignant phenotypes (Vaupel and Mayer, 2007). More-  
13 over, low nutrient levels can lead to cell quiescence, a situation in which  
14 tumor cells delay metabolic activities and become less sensitive to standard  
15 chemotherapies (Challapalli et al., 2017). Such hypo-perfused areas are gen-  
16 erally associated with poor patient outcome but, on the other hand, could  
17 be exploited for tumor targeting (Wilson and Hay, 2011). The same hypoxic  
18 areas provide indeed a niche for bacteria to colonize the tumor and exert a  
19 therapeutic action (Forbes, 2010; Zhou et al., 2018). The use of bacteria for  
20 cancer therapy dates back hundreds of years, with doctors reporting tumor  
21 regression in several patients (Kramer et al., 2018). However, such treatments  
22 also caused some fatalities and the limited understanding of the mechanisms  
23 of action of these therapies shifted research efforts towards other strategies  
24 - especially radiotherapy (Kramer et al., 2018). In the last few years the  
25 use of live bacteria for cancer treatment has gained new interest, and several  
26 bacterial strains have been tested in animal models and even advanced to  
27 clinical trials (Torres et al., 2018). Nevertheless, clinical development of such  
28 therapies is still facing significant issues due to infection-associated toxicities  
29 and incomplete knowledge of infection dynamics (Kramer et al., 2018; Zhou  
30 et al., 2018).

31 Mathematical modeling emerges as a promising candidate to assist the  
32 understanding of the mechanism of action of bacterial therapy in cancer.  
33 Mathematical models have been applied in the context of cancer to elucidate  
34 its progression and treatment (Byrne, 2010; Altrock et al., 2015). The au-  
35 thors in (Kasinskas and Forbes, 2006) performed experiments to quantify the  
36 accumulation of bacteria in an *in vitro* tumor tissue. Using fluorescent mi-  
37 croscopy they measured the accumulation of *Salmonella typhimurium* into

38 cylindroids of different size. Their results were fitted to a mathematical  
39 model quantifying bacterial growth and infiltration in the cellular aggregate,  
40 showing that bacteria accumulate for longer times in larger cylindroids. Us-  
41 ing a similar approach in a different *in vitro* setting, another group analyzed  
42 the impact of bacterial motility on tumor accumulation (Toley and Forbes,  
43 2011). They considered different bacterial strains belonging to *Salmonella*  
44 *typhimurium* and *Escherichia coli*, and observed that only the most motile of  
45 them was able to colonize the tumor at low inoculation densities. Through a  
46 mathematical model informed by the experiments the authors showed that  
47 bacterial dispersion provides deeper infiltration in the tumor, whereas bac-  
48 terial growth leads to increased bacterial densities. A cytotoxic protein in  
49 *Escherichia coli* was cloned to investigate its effects on tumors as discussed in  
50 (Jean et al., 2014). The authors of the article showed that bacteria were able  
51 to secrete this protein when injected in tumors, leading to cell death and tu-  
52 mor volume reduction. The authors measured the distribution of the protein  
53 in the tissue and observed a large necrotic area following treatment. They  
54 introduced a mathematical model for molecular transport and showed that  
55 the protein efficacy in killing cancer cells primarily depends on the colony size  
56 and rate of production. More recently, a mathematical model for immune  
57 recruitment in tumors by bacterial infections was proposed in (Hatzikirou  
58 et al., 2017). Calibrated on mice data, the model showed that increasing  
59 bacterial loads does not always produce long-term tumor control, suggesting  
60 the existence of optimal bacterial loads depending on tumor size. In addi-  
61 tion, the model predicted that the combined effect of intermediate bacterial  
62 loads and low administration of a proinflammatory cytokine may lead to im-  
63 proved therapeutic outcomes. The infiltration of nanoparticles and bacteria  
64 in *in vitro* tumors was analyzed in (Suh et al., 2018). Through mathematical  
65 modeling the authors showed that bacteria display higher effective diffusivi-  
66 ties compared to nanoparticles, suggesting their use as drug vectors in future  
67 cancer treatments. Notably, they validated their modeling procedure with  
68 experiments using tumor spheroids. The latter are aggregates of tumor cells  
69 (approximately spherical) that can be grown *in vitro*, mimicking the growth  
70 dynamics and generation of hypoxic areas in small avascular tumors.

71 Here we describe a mathematical model for bacteria-based cancer therapy  
72 within tumor spheroids. The model is formulated in the context of mixture  
73 theory, a continuum theory with a long history of applications to biological  
74 problems - see for example Ambrosi and Preziosi (2002); Breward et al. (2001,  
75 2002, 2003); Byrne and Preziosi (2003); Chaplain et al. (2006); Preziosi and

76 Tosin (2009) and the recent reviews of Siddique et al. (2017); Pesavento  
77 et al. (2017). Our aim is to evaluate the impact of bacterial chemotaxis  
78 and anti-tumor activity on spheroid size and composition. We consider two  
79 regimes, i.e. a constant infusion of bacteria in the culture medium and an  
80 administration after the spheroid is fully established. We describe the effects  
81 of the treatment on the behavior of the spheroid constituents, e.g. tumor  
82 cells and bacteria volume fractions, at different time points and over the  
83 spheroid radius.

84 The remainder of the paper is organized as follows. In Section 2 we de-  
85 scribe the mathematical model and its derivation. In Section 3 we present  
86 model results, first focusing on continuous infusion of bacteria and then an-  
87 alyzing time-controlled bacterial administration. Finally, in Section 4 we  
88 discuss the biological implications of the results and suggest new research  
89 directions.

## 90 2. Mathematical model

91 We propose a mathematical model describing the impact of bacterial cells  
92 on tumor spheroid growth. The model is based on mixture theory, follow-  
93 ing the approach discussed in Preziosi (2003); Byrne (2012). Specifically, we  
94 follow the derivation in Boemo and Byrne (2019) which deals with a mix-  
95 ture model for macrophage-based therapies in tumor spheroids. We describe  
96 the tumor as being composed of three main constituents (or *phases* in the  
97 language of mixture theory): tumor cells (TCs), bacteria and extracellular  
98 material. The variables referring to these quantities will be identified by the  
99 indexes  $c$ ,  $b$  and  $f$ , respectively. The model equations are derived by applying  
100 conservation of mass and linear momentum to each phase. Then, we close the  
101 model by imposing suitable constitutive assumptions regarding the material  
102 properties of the phases and their interaction terms.

103 The balance of mass for each phase reads:

$$\partial_t \phi_i + \operatorname{div}(\phi_i \mathbf{v}_i) = S_i, \quad (1)$$

104 in which  $\phi_i$ ,  $\mathbf{v}_i$  and  $S_i$  are the volume fraction, velocity and mass ex-  
105 change term related to the  $i$ -th phase ( $i = c, b, f$ ). Note that Equation (1)  
106 implicitly assumes that the phases have the same constant mass density. In  
107 the following we will also assume that the mixture is closed with respect to  
108 mass, so that mass can only be converted from one phase to the other, i.e.  
109  $S_f = -S_c - S_b$ .

110 In mixture theory velocity fields are determined by considering the me-  
111 chanical response of the phases to mutual interactions. Neglecting inertial  
112 effects, as usually done for growth phenomena (Preziosi, 2003; Byrne, 2012),  
113 the balance of linear momentum can be written as:

$$\operatorname{div}(\boldsymbol{\sigma}_i) + \sum_{i \neq j} \mathbf{m}_{ij} + p \operatorname{grad}(\phi_i) = \mathbf{m}_i. \quad (2)$$

114 Here  $\boldsymbol{\sigma}_i$  is the partial stress tensor of the  $i$ -th phase,  $\mathbf{m}_{ij}$  represent the  
115 forces exerted on the  $i$ -th phase by the  $j$ -th phase, and  $\mathbf{m}_i$  describes an ex-  
116 ternal force acting on the  $i$ -th phase ( $i, j = c, b, f$ ). Note that, for the  
117 action-reaction principle,  $\mathbf{m}_{ij} = -\mathbf{m}_{ji}$ . Finally, the terms  $p \operatorname{grad}(\phi_i)$  repre-  
118 sent interfacial effects between phases, with  $p$  being the interfacial pressure  
119 (Byrne, 2012). In this modeling framework,  $p$  emerges as a Lagrange multi-  
120 plier due to the saturation constraint

$$\sum_{i=c,b,f} \phi_i = 1, \quad (3)$$

121 meaning that we assume that there are no empty spaces within the mix-  
122 ture (Preziosi, 2003; Byrne, 2012).

123 We conclude the set of governing laws by stating an equation for the  
124 normalized nutrient concentration  $n$  in the mixture, i.e. the tumor:

$$\partial_t n = D_n \operatorname{div}(\operatorname{grad} n) + S_n, \quad (4)$$

125 in which  $D_n$  is the nutrient diffusion coefficient and  $S_n$  represents the  
126 nutrient mass exchange with the model phases. In the following we will  
127 consider a single nutrient, i.e. oxygen.

### 128 *2.1. Constitutive relationships*

129 We close the model by selecting suitable constitutive assumptions. First,  
130 we assume that the interaction terms  $m_{ij}$  depend linearly on the relative  
131 phase velocities (Preziosi, 2003; Byrne, 2012):

$$\mathbf{m}_{ij} = -\mu \phi_i \phi_j (\mathbf{v}_i - \mathbf{v}_j), \quad (5)$$

132 with the same linearity constant  $\mu$  for all the phases ( $i = c, b, f$ ). We  
133 consider only a single external force  $\mathbf{m}_b$  acting on bacteria. This term de-  
134 scribes bacteria chemotaxis following spatial hypoxic gradients and models

135 active cell migration towards waste products from dying cancer cells (Forbes,  
136 2010; Toley and Forbes, 2011). We assume a linear relationship,

$$\mathbf{m}_b = \phi_b \chi_b \text{grad } n, \quad (6)$$

137 in which  $\chi_b$  describes the strength of chemoattraction.

138 Following Breward et al. (2001, 2002); Byrne (2012); Boemo and Byrne  
139 (2019) we consider the phases as inviscid fluids and associate an interfacial  
140 pressure to each of them. For simplicity, we take the pressure in the extra-  
141 cellular material to be equal to that in the fluid surrounding the spheroid,  $p$ .  
142 The partial stress tensors in Equation (2) are defined such that the interfacial  
143 pressure of each phase is given by the pressure in the extracellular material  
144 plus a correction term, specific to its phase (Boemo and Byrne, 2019):

$$\boldsymbol{\sigma}_f = -p\mathbf{I}, \quad (7)$$

$$\boldsymbol{\sigma}_b = -(p + \pi_b)\mathbf{I}, \quad (8)$$

$$\boldsymbol{\sigma}_c = -(p + \pi_c)\mathbf{I}, \quad (9)$$

145 where  $\mathbf{I}$  is the identity tensor. The ratio  $\pi_i/\mu$  characterizes the movement  
146 of the  $i$ -th phase in the mixture and is generally identified as the phase  
147 motility coefficient  $D_i$  ( $i = c, b$ ) (Boemo and Byrne, 2019). In the following  
148 we will also define  $\chi = \chi_b/\mu$  as the bacterial chemotactic coefficient.

149 To formulate the mass exchange terms in Equations (1) and (4) we assume  
150 the following assumptions:

151 **A1** TCs proliferate when oxygen is available. As soon as the latter de-  
152 creases below a critical threshold, they stop proliferating and start  
153 necrosis (Chaplain et al., 2006; Gerlee and Anderson, 2007; Agosti  
154 et al., 2018).

155 **A2** Bacteria compete with TCs for space and exert an anti-tumor effect  
156 by a variety of mechanisms (e.g. by realising toxins and therapeutic  
157 agents, or stimulating an immune response). (Forbes, 2010; Osswald  
158 et al., 2015; Torres et al., 2018; Zhou et al., 2018).

159 **A3** Bacteria die when oxygen is above a critical threshold and thrive in  
160 hypoxic conditions (*anaerobic* bacteria) (Toley and Forbes, 2011; Phai-  
161 boun et al., 2015; Osswald et al., 2015).

162 **A4** TCs consume oxygen provided by the culture medium (Matzavinos  
163 et al., 2009; Grimes et al., 2014).

The resulting mass exchange terms read:

$$S_c = \gamma_c \phi_c \phi_f \mathcal{H} \left( \frac{n}{n_{cr}} - 1 \right) - \delta_c \phi_c \mathcal{H} \left( 1 - \frac{n}{n_{cr}} \right) - \kappa \phi_c \phi_b, \quad (10)$$

$$S_b = \gamma_b \phi_b \phi_f \mathcal{H} \left( 1 - \frac{n}{n_{cr}} \right) - \delta_b \phi_b \mathcal{H} \left( \frac{n}{n_{cr}} - 1 \right), \quad (11)$$

$$S_n = -\delta_n \phi_c n. \quad (12)$$

164 Here  $\gamma_i$  and  $\delta_i$  are the proliferation and death rate of the  $i$ -th phase re-  
165 spectively ( $i = c, b$ ), whereas  $\delta_n$  is the oxygen consumption rate. We indicate  
166 with  $\mathcal{H}(\cdot)$  a smooth version of the step function, and with  $n_{cr}$  the critical  
167 oxygen value below which hypoxic conditions develop. Finally, we do not  
168 consider a specific form for the anti-tumor effect of bacteria and introduce  
169 an effective TC killing rate  $\kappa$  in the equation for  $S_c$ .

## 170 2.2. Spherical symmetry, initial and boundary conditions

171 In the following we will be interested in the case of tumor spheroids, for  
172 which the assumption of spherical symmetry applies. Therefore, we enforce  
173 the problem symmetry and rewrite the equations in terms of one-dimensional,  
174 radially symmetric spherical coordinates. We introduce the radial coordinate  
175  $r$  defining the radial distance from the center of the spheroid. Recasting  
176 Equation (1) in spherical symmetry, after imposing the saturation constraint  
177 in Equation (3), gives:

$$v_c \phi_c + v_b \phi_b + v_f \phi_f = 0, \quad (13)$$

178 in which  $v_i$  is the radial velocity of the  $i$ -th phase ( $i = c, b, f$ ). Substituting  
179 Equations (5), (7)-(9) and (13) in Equation (2) we obtain for the radial  
180 velocities:

$$v_c = D_b \frac{\partial \phi_b}{\partial r} + D_c \left( 1 - \frac{1}{\phi_c} \right) \frac{\partial \phi_c}{\partial r} + \chi \phi_b \frac{\partial n}{\partial r}, \quad (14)$$

$$v_b = D_b \left( 1 - \frac{1}{\phi_b} \right) \frac{\partial \phi_b}{\partial r} + D_c \frac{\partial \phi_c}{\partial r} - \chi (1 - \phi_b) \frac{\partial n}{\partial r}, \quad (15)$$

181 after summing over the phases in Equation (2) to express  $p$  as a function of  
 182 the other model quantities (Boemo and Byrne, 2019). Substituting Equations  
 183 (14)-(15) in (1) and rewriting the system in spherical symmetry leads to

$$\frac{\partial \phi_c}{\partial t} = \frac{1}{r^2} \frac{\partial}{\partial r} \left\{ r^2 \left[ D_c (1 - \phi_c) \frac{\partial \phi_c}{\partial r} - D_b \phi_c \frac{\partial \phi_b}{\partial r} - \chi \phi_c \phi_b \frac{\partial n}{\partial r} \right] \right\} + S_c, \quad (16)$$

$$\frac{\partial \phi_b}{\partial t} = \frac{1}{r^2} \frac{\partial}{\partial r} \left\{ r^2 \left[ D_b (1 - \phi_b) \frac{\partial \phi_b}{\partial r} - D_c \phi_b \frac{\partial \phi_c}{\partial r} + \chi \phi_b (1 - \phi_b) \frac{\partial n}{\partial r} \right] \right\} + S_b, \quad (17)$$

$$\frac{\partial n}{\partial t} = \frac{1}{r^2} \frac{\partial}{\partial r} \left( r^2 D_n \frac{\partial n}{\partial r} \right) + S_n. \quad (18)$$

184 Note that we do not solve for  $\phi_f$  since it can be obtained as  $\phi_f = 1 - \phi_c - \phi_b$   
 185 through Equation (3).

186 We model growth of the spheroid as a free-boundary problem, in which  
 187 the outer tumor radius  $r = R(t)$  moves with the same velocity as the TC  
 188 phase,

$$\frac{dR}{dt} = v_c(R, t). \quad (19)$$

189 Finally, we define a set of boundary and initial conditions to close the  
 190 differential problem in Equations (16)-(18). Due to the problem symmetry  
 191 no-flow boundary conditions are enforced at the spheroid center, whereas we  
 192 fix the values of TC volume fraction, bacterial volume fraction and normal-  
 193 ized nutrient concentration on the spheroid boundary:

$$\partial_r \phi_c = \partial_r \phi_b = \partial_r n = 0, \quad r = 0 \quad (20)$$

$$\phi_c = \phi_{c0}, \quad \phi_b = \phi_{b0}, \quad n = 1, \quad r = R(t). \quad (21)$$

194 In the following, we assume a uniform initial tumor volume fraction  $\phi_{c0} =$   
 195 0.8 across the spheroid (Byrne and Preziosi, 2003) and consider a small value  
 196 for the bacterial volume fraction at the spheroid outer radius, i.e.  $\phi_{b0} = 0.01$ .  
 197 Regarding the initial conditions, we consider a spheroid devoid of bacteria  
 198 and displaying a uniform TC volume fraction and nutrient concentration over  
 199 its radius:

$$\phi_c(r, 0) = \phi_{c0}, \quad \phi_b = 0, \quad n = 1. \quad (22)$$

200 Finally, we prescribe an initial spheroid radius, i.e.  $R(0) = 150 \mu\text{m}$ .



| Parameter       | Value                                                  | Description                       | Reference                        |
|-----------------|--------------------------------------------------------|-----------------------------------|----------------------------------|
| $D_c$           | $8.64 \times 10^{-2} \text{ mm}^2 \text{ d}^{-1}$      | TC motility coefficient           | (Chaplain et al., 2006)          |
| $\gamma_c$      | $1 \text{ d}^{-1}$                                     | TC proliferation rate             | (Chaplain et al., 2006)          |
| $n_{\text{cr}}$ | 0.6                                                    | Critical oxygen concentration     | (Gerlee and Anderson, 2007)      |
| $\delta_c$      | $0.5 \text{ d}^{-1}$                                   | TC death rate                     | (Martínez-González et al., 2012) |
| $D_b$           | $5 \times 10^{-2} \text{ mm}^2 \text{ d}^{-1}$         | Bacterial motility coefficient    | (Toley and Forbes, 2011)         |
| $\gamma_b$      | $15 \text{ d}^{-1}$                                    | Bacterial proliferation rate      | (Gibson et al., 2018)            |
| $\delta_b$      | $0.24 \text{ d}^{-1}$                                  | Bacterial death rate              | (Phaiboun et al., 2015)          |
| $D_n$           | $1 \times 10^2 \text{ mm}^2 \text{ d}^{-1}$            | Oxygen diffusion coefficient      | (Matzavinos et al., 2009)        |
| $\delta_n$      | $8.64 \times 10^3 \text{ d}^{-1}$                      | Oxygen consumption rate           | (Colombo et al., 2015)           |
| $\chi$          | $[0, 8.64 \times 10^{-1}] \text{ mm}^2 \text{ d}^{-1}$ | Bacterial chemotactic coefficient | estimated                        |
| $\kappa$        | $[0, 10] \text{ d}^{-1}$                               | Bacterial killing rate            | model specific                   |

Table 1: Summary of the parameter estimates used to carry out the model simulations.

### 201 2.3. Parameter estimation

202 The parameters used in the model simulations are reported in Table 1.  
 203 As we do not focus on a specific cell line we use the generic estimate for  
 204 TC motility and proliferation rate reported in (Chaplain et al., 2006). For  
 205 the critical oxygen concentration, below which cells experience hypoxic con-  
 206 ditions, we take a value similar to the one in (Gerlee and Anderson, 2007;  
 207 Agosti et al., 2018). Also, we select the TC death rate in accordance to the  
 208 estimate in (Kolokotroni et al., 2011; Martínez-González et al., 2012). The  
 209 work in (Toley and Forbes, 2011) provides a value for the bacterial motility  
 210 coefficient and proliferation rate in *in vitro* cellular aggregates. Regarding  
 211 bacterial proliferation, (Gibson et al., 2018) supply a similar value using evo-  
 212 lutionary arguments. We estimate the bacterial death rate from (Phaiboun  
 213 et al., 2015), in which cellular death dynamics are quantified under starva-  
 214 tion at different bacteria densities. Finally, we use the values in (Schaller and  
 215 Meyer-Hermann, 2005; Matzavinos et al., 2009; Grimes et al., 2014; Colombo  
 216 et al., 2015; Alfonso et al., 2016) for the oxygen diffusion coefficient and con-  
 217 sumption rate in tumor tissues. When carrying out the simulations, we vary  
 218 the chemotactic coefficient in the interval  $[0, 8.64 \times 10^{-1}] \text{ mm}^2 \text{ d}^{-1}$ . Since it  
 219 was not possible to find in the literature an estimate for the chemotactic  
 220 coefficient of bacteria in tissues, we considered the value of  $\chi$  in bacterial  
 221 solutions (Ford et al., 1991; Lewus and Ford, 2001) and divided it for the  
 222 ratio between the motility coefficient in solution and in tissue - about 100,  
 223 (Ford et al., 1991; Lewus and Ford, 2001). Since we do not consider a specific  
 224 mechanism for the anti-tumor activity of bacteria, we select the killing rate  
 225  $\kappa$  to be in the interval  $[0, 10] \text{ d}^{-1}$ , i.e. spanning characteristic times between

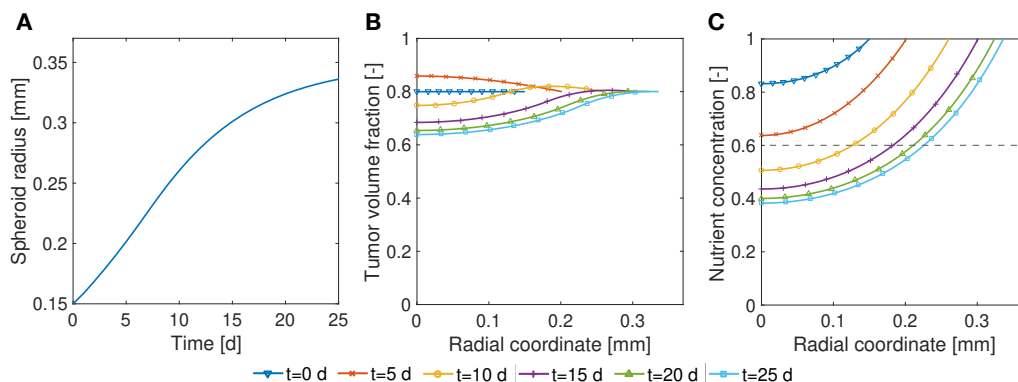

Figure 1: Spatio-temporal description of a tumor spheroid suspended in the culture medium. **A** Spheroid growth curve. Tumor volume fraction (**B**) and nutrient concentration (**C**) over the spheroid radius at different time points. The dashed line in **C** displays the critical nutrient level. After an initial stage of fast growth, the size of the aggregate saturates as a result of poor nutrient availability.

226 several days and a few hours.

### 227 3. Results

#### 228 3.1. Growth of spheroids in culture medium

229 We start the analysis by considering the growth of a spheroid suspended  
 230 in culture medium, in the absence of bacteria. Results for this condition are  
 231 reported in Figure 1, using the parameters in Table 1 for the simulation.  
 232 The model is able to reproduce the two phases of spheroid growth usually  
 233 described in the literature (Conger and Ziskin, 1983; Sutherland, 1988; Vinci  
 234 et al., 2012). The spheroid radius (see Figure 1A) displays a first stage of  
 235 rapid increase, followed by a saturation phase. This behavior is detailed  
 236 in Figures 1B,C, showing the evolution of the tumor volume fraction and  
 237 nutrient concentration over the spheroid radius at different time points. The  
 238 tumor volume fraction, i.e.  $\phi_c$ , increases over the spheroid at early time points  
 239 (Figure 1B). Then, as TCs consume oxygen to proliferate, its concentration  
 240 decreases in the centre of the aggregate (Figure 1C). When the oxygen level  
 241 drops below the critical threshold  $n_{cr}$  (dashed line in Figure 1C), TCs stop  
 242 proliferating and die. This results in a decrease of  $\phi_c$  in the spheroid core,  
 243 displayed at longer times in Figure 1B. Close to saturation, the amount of  
 244 cells that proliferate is balanced by the number of cells that die, turning into

245 extracellular material. Therefore, even if cell growth continues to take place  
246 in the outer rim of the spheroid, it is not enough to advance the spheroid  
247 front, which reaches a steady state. These results match qualitatively what  
248 is observed in the experimental (Landry et al., 1982; Montel et al., 2011;  
249 Grimes et al., 2014; Sarkar et al., 2018) and modeling (Ward and King, 1999;  
250 Byrne and Preziosi, 2003; Ambrosi and Mollica, 2004; Schaller and Meyer-  
251 Hermann, 2005; Mascheroni et al., 2016; Boemo and Byrne, 2019) literature  
252 for tumor spheroids and will serve as a basis for the discussion in the next  
253 sections.

### 254 *3.2. Spheroid growth in the presence of bacteria*

255 In this subsection, we investigate the growth of a spheroid that is co-  
256 cultured with bacteria immediately after its formation. From the modeling  
257 point of view, this results in assuming a constant bacterial volume fraction  
258 at the spheroid boundary, i.e.  $\phi_b(R, t) = \phi_{b0}$ . First, we analyse the case  
259 of bacteria infiltrating the spheroid with different chemotactic coefficients  
260  $\chi$ , without considering the anti-tumor activity of bacteria (i.e.  $\kappa = 0 \text{ d}^{-1}$ ).  
261 Then, we fix the chemotactic coefficient and analyze the evolution of the  
262 spheroid for increasing effectiveness of bacteria anti-tumor activity, quantified  
263 by the killing coefficient  $\kappa$ .

#### 264 *3.2.1. Effects of chemotactic coefficient on spheroid growth*

265 The impact of bacterial chemotactic coefficient on spheroid infiltration  
266 is shown in Figure 2. The presence of bacteria in the culture medium sig-  
267 nificantly influences the growth dynamics, as displayed by the growth curve  
268 in Figure 2A. For low chemotactic coefficients the saturation radius of the  
269 spheroid decreases. However, by increasing the chemotactic coefficient the  
270 growth curve loses the saturation phase (at least for the time observed in the  
271 simulation). The spheroid reaches the largest size for the highest value of  
272  $\chi$ , being still in a fast-growing regime. Figure 2B shows how the tumor vol-  
273 ume fraction at the end of the simulation is affected by bacterial chemotaxis.  
274 Bacteria progressively displace TCs for increasing values of the chemotactic  
275 coefficient, leading to spheroids that are significantly depleted from TCs at  
276 higher  $\chi$  values. We note that chemotaxis is necessary for bacteria to effec-  
277 tively colonize the core of the spheroid, as displayed by the plot of bacterial  
278 volume fraction at the end of the simulation in Figure 2C. Bacteria that are  
279 not subject to chemotaxis ( $\chi = 0 \text{ mm}^2 \text{ d}^{-1}$ ) do not colonize successfully the  
280 spheroid, and populate the aggregate through a low uniform volume fraction.

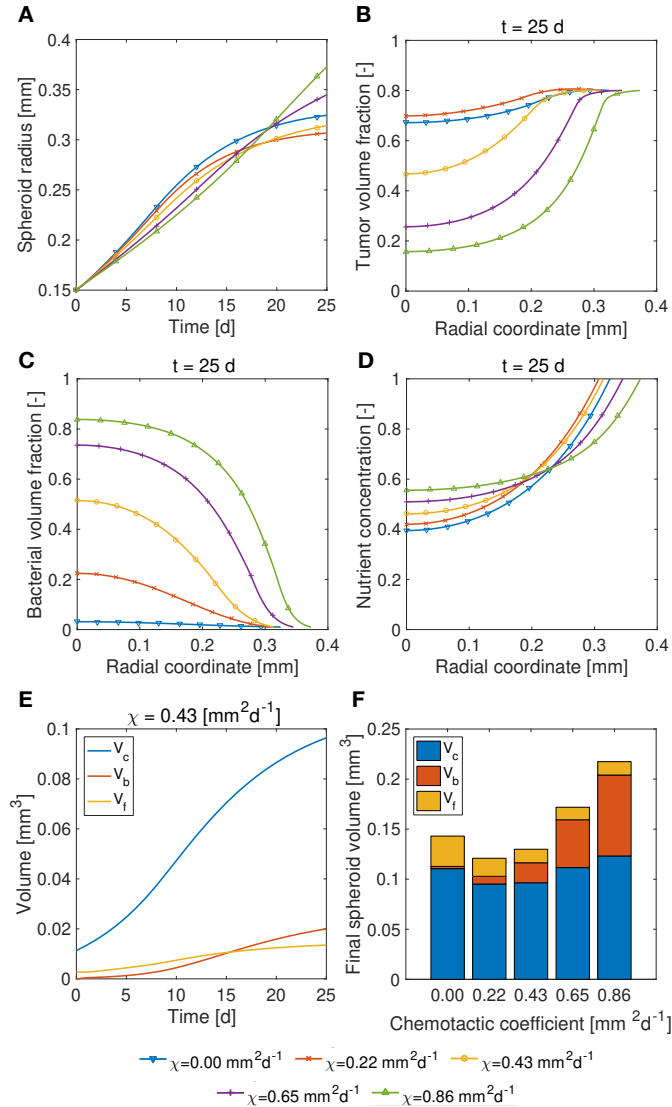

Figure 2: Influence of bacterial chemotactic coefficient on spheroid infiltration. **A** Spheroid growth over time. Profiles of tumor (**B**) and bacterial (**C**) volume fractions, and nutrient concentration (**D**) over the spheroid radius for different values of  $\chi$  at the end of the simulation. **E** Variation of TC, bacterial and extracellular volumes over time for an intermediate value of  $\chi$ . **F** Contribution of the different constituents to the final spheroid volume. The model shows that chemotaxis is necessary for bacteria to localize in the hypoxic core of the spheroid. Moreover, high chemotactic coefficients lead to spheroids with larger radii.

281 On the other hand, higher values of  $\chi$  lead to large bacterial volume frac-  
282 tions in the center of the spheroid, where a hypoxic region is localized. As  
283 a result, the core of these spheroids is filled with bacterial cells, as observed  
284 in experimental works (Osswald et al., 2015; Suh et al., 2018). Such hypoxic  
285 zones occupy most of the spheroid, as shown by the plot for the nutrient con-  
286 centration over the spheroid radius (Figure 2D). The nutrient level generally  
287 elevates for higher values of the chemotactic coefficient, since in those cases  
288 there are fewer TCs that consume oxygen. As displayed in Figures 2B and  
289 2C, high values of the chemotactic coefficient lead to spheroids with large  
290 final radii but low TC volume fraction in the core. The growth of bacteria  
291 pushes cancer cells towards the spheroid boundary, leading only a small frac-  
292 tion of them above the hypoxic threshold. Figure 2E shows the evolution  
293 of TC ( $V_c$ ), bacterial ( $V_b$ ) and extracellular ( $V_f$ ) volumes over time for an  
294 intermediate chemotactic coefficient. These quantities are calculated as

$$V_i = \int_{V_{sf}} \phi_i dV, \quad (23)$$

295 where the integral is performed over the spheroid volume  $V_{sf}$  ( $i = c, b, f$ ).  
296 At early time points,  $V_c$  is in a phase of fast growth, since nutrient is available  
297 throughout the spheroid and bacterial presence is minimal. At later times,  
298 hypoxic regions develop and TC proliferation decreases. On the contrary,  
299 these conditions are favourable for bacteria, leading to a higher growth rate  
300 for  $V_b$ . The growth of both TCs and bacteria over time contributes to a  
301 slow increase of extracellular material, as displayed by the plot of  $V_f$  over  
302 time. Figure 2F shows the contribution of TCs, bacteria and extracellular  
303 fluid to the final spheroid volume. Note that lower volumes are attained  
304 for intermediate chemotactic coefficients ( $\chi = 0.22, 0.43 \text{ mm}^2\text{d}^{-1}$ ). For these  
305 cases, bacteria compete with TCs for space and lead to low TC volumes. On  
306 the other hand, higher values of  $\chi$  lead to considerable colonization of the  
307 spheroid by bacteria, contributing to higher bacterial and spheroid volumes.

### 308 3.2.2. *Effects of killing rate on spheroid growth*

309 Figure 3 shows the influence of the killing rate  $\kappa$  on the growth of a tu-  
310 mor spheroid. For these simulations, we considered an intermediate value  
311 of the chemotactic coefficient ( $\chi = 0.43 \text{ mm}^2\text{d}^{-1}$ ), to allow for spheroid in-  
312 filtration by bacteria. Increasing  $\kappa$  leads to significant changes in spheroid  
313 morphology. As shown in Figures 3A,B TCs display higher volume fractions  
314 for higher values of the killing coefficient, whereas the opposite is true for

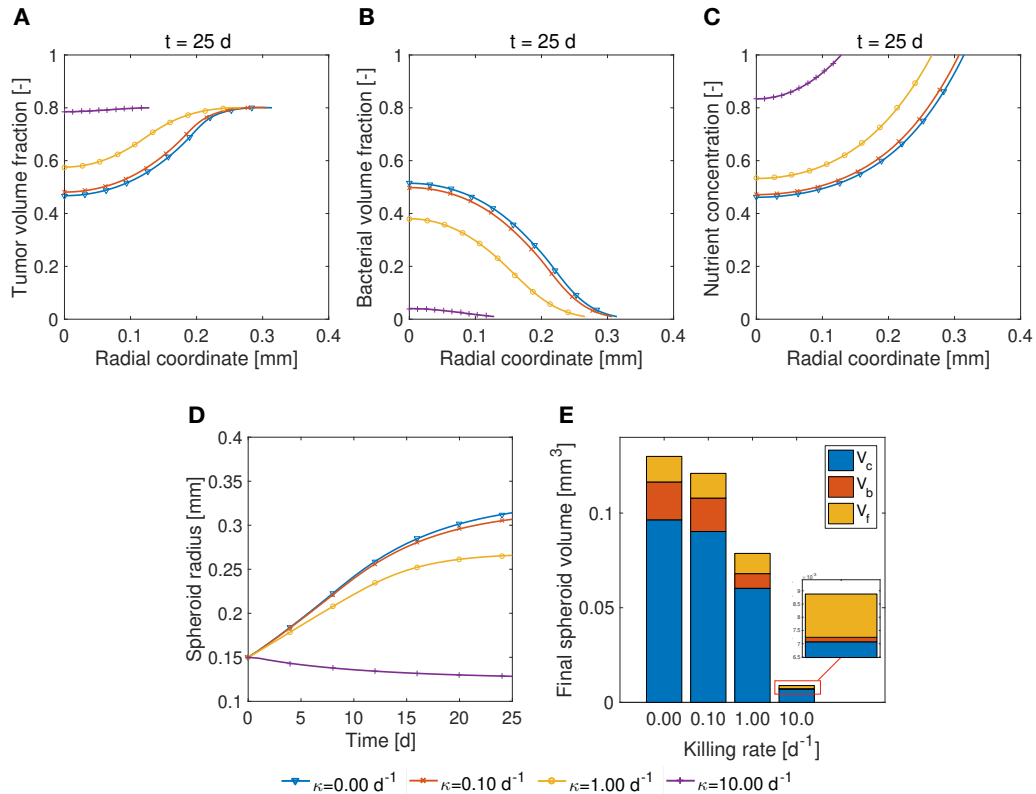

Figure 3: Influence of bacterial killing coefficient on spheroid growth. Plots of tumor (A) and bacterial (B) volume fractions, and nutrient concentration (C) over the spheroid radius for different values of  $\kappa$  at the end of the simulation. Spheroid growth curve (D) and contribution of the different constituents to the final spheroid volume (E). Increasing the killing rate leads to smaller spheroids and lower final bacterial volumes.

315 bacteria. Consistently with the behavior of the previous quantities, nutri-  
316 ent concentration (Figure 3C) increases for higher values of  $\kappa$ , since smaller  
317 spheroids are formed and nutrient can adequately diffuse to their cores. The  
318 effect of the killing rate on the spheroid radius is displayed in Figure 3D. By  
319 increasing the value of  $\kappa$ , the growth rate of the spheroid decreases, turning  
320 even to negative for the highest  $\kappa$  value. The final volume of the spheroids  
321 decreases with increasing the cell killing rate (Figure 3E), a trend that is  
322 also followed by the ratio of the bacterial to TC volumes. The extracellular  
323 volume also decreases with increasing  $\kappa$ , indicating that spheroids denser in  
324 TCs are obtained.

### 325 3.3. Administration of bacteria to established spheroids

326 In this subsection, we evaluate the effects of adding bacteria in the culture  
327 medium after the spheroid is fully formed, i.e. when hypoxic regions have  
328 developed. We analyze the effects of different bacterial chemotactic and  
329 killing coefficients on the behavior of the model constituents and on the  
330 overall growth of the spheroid at later times after bacteria administration.

#### 331 3.3.1. Effects of chemotactic coefficient on spheroid growth after bacterial 332 administration

333 Figure 4A shows the growth curves of spheroids that have been admin-  
334 istered to bacteria carrying different chemotactic coefficients. The spheroid  
335 grows in standard culture medium until day 25, when a bacterial administra-  
336 tion (black arrow) is performed. The boundary condition  $\phi_b(R, t) = \phi_{b0}$  is  
337 applied for three days and then bacteria are removed at day 28 (first dashed  
338 line). In the absence of chemotaxis ( $\chi = 0 \text{ mm}^2\text{d}^{-1}$ ) the presence of bacteria  
339 leads to a small perturbation in the growth curve, which is resolved at the  
340 end of the simulation. On the contrary non-zero values of  $\chi$  substantially al-  
341 ter the growth pattern, resulting in spheroids of smaller (intermediate values  
342 of  $\chi$ ) or larger (high values of  $\chi$ ) final radii (Figure 4B).

343 The behavior of the different components of the model at day 28, 33  
344 (dashed lines in Figure 5) and 53 is reported in Figure 5. TC volume frac-  
345 tion is considerably affected by the chemotactic behavior of bacterial cells, in  
346 all the three observation times (Figures 5A,D,G). Chemotactic coefficients  
347 greater than  $\chi = 0.22 \text{ mm}^2\text{d}^{-1}$  lead to lower  $\phi_c$  at the spheroid center with  
348 respect to the no-chemotactic case ( $\chi = 0 \text{ mm}^2\text{d}^{-1}$ ). For the highest value of  
349  $\chi$  the spheroid core is mostly composed of bacteria, a situation that persists

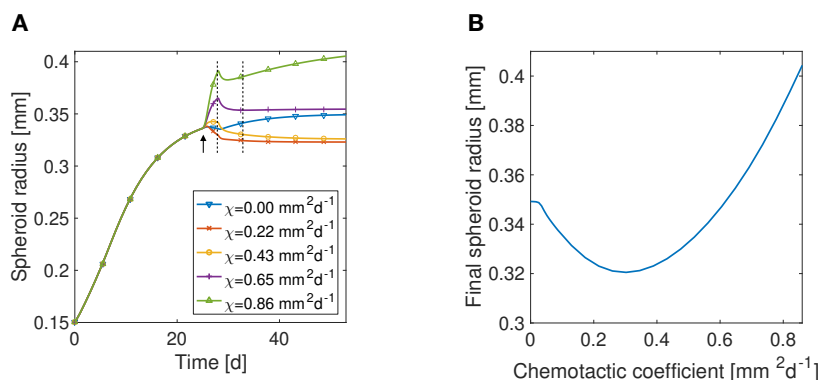

Figure 4: **A** Influence of bacterial chemotactic coefficient on tumor spheroids growth curve after bacterial administration. The black arrow indicates the time of bacterial administration, whereas the dashed lines highlight the observation time points in the following plots. Intermediate values of  $\chi$  lead to smaller saturation radii if compared to bacterial infiltration in the absence of chemotaxis. On the other hand, higher chemotactic coefficients give rise to larger spheroids. **B** Final spheroid radius as a function of the chemotactic coefficient. The minimum radius is for  $\chi \approx 0.3\text{mm}^2\text{d}^{-1}$ .

350 even at 53 days, far from the administration time. Bacteria have success-  
 351 fully colonized the spheroid and TCs are pushed towards the outer rim of the  
 352 spheroid, where oxygen is still above the critical limit. The plots for bacterial  
 353 volume fraction (Figures 5B,E,H) clearly show that chemotaxis is necessary  
 354 to allow for bacterial colonization of the spheroid. The case of  $\chi = 0 \text{ mm}^2\text{d}^{-1}$ ,  
 355 indeed, shows bacterial cells only right after the administration at day 28  
 356 (Figure 5B). At later time points (Figures 5E,H) the bacterial volume frac-  
 357 tion is zero across the whole spheroid radius, indicating that bacteria have  
 358 not managed to adequately infiltrate the aggregate. Regarding the other  
 359 chemotactic coefficients, the plots for  $\phi_b$  mirror those for  $\phi_c$ , i.e. the fraction  
 360 of spheroid occupied by bacteria increases with the chemotactic coefficient.  
 361 Concerning the nutrient concentration, the case without chemotaxis shows  
 362 the lowest nutrient level across the spheroid for all the time points (Figures  
 363 5C,F,I). In this case, the spheroid is almost entirely composed of TCs which  
 364 consume oxygen to proliferate. As in the other conditions ( $\chi \neq 0 \text{ mm}^2\text{d}^{-1}$ )  
 365 bacteria take the place of TCs over the spheroid radius, lower TC volume  
 366 fractions lead to diminished nutrient consumption.

367 Finally, we consider in Figure 6 how the model components add to the  
 368 spheroid volume at the different observation time points. Consistently with  
 369 Figure 5 bacteria moving without chemotaxis do not contribute to the spheroid



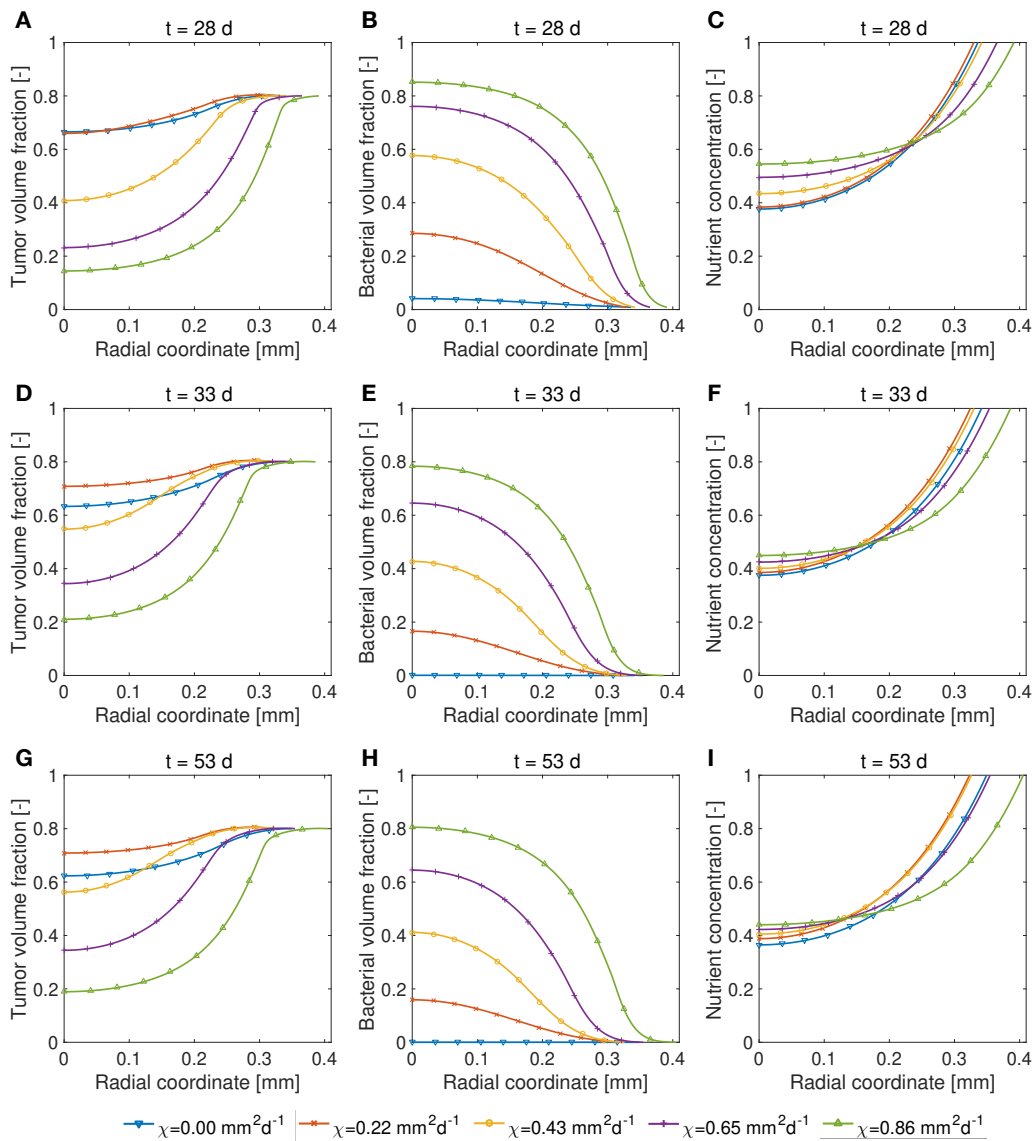

Figure 5: Plots for the volume fractions (TCs and bacteria) and nutrient concentration over the spheroid radius at different observation time points after bacterial administration. Different chemotactic coefficients are considered. TCs: **A, D, G**; bacteria: **B, E, H**; nutrient: **C, F, I**. Chemotaxis is necessary for successful colonization of the spheroid by bacteria. High values of the chemotactic coefficient lead to larger spheroids populated by high bacterial volume fractions.

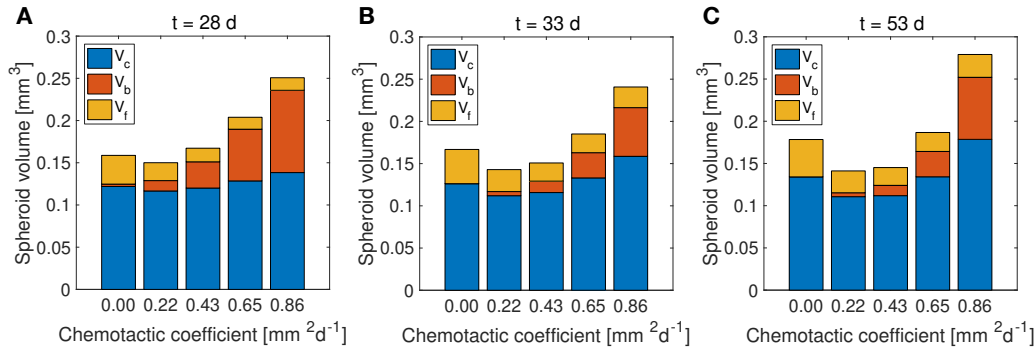

Figure 6: Composition of the spheroid volume at day 28 (A), 33 (B) and 53 (C) for different chemotactic coefficients in the case of bacterial administration. Intermediate chemotactic coefficients lead to smaller spheroid volumes. The fraction of bacterial volume increases with the value of the chemotactic coefficient.

370 volume at later time points (Figures 6B,C). Intermediate values of the chemo-  
 371 tactic coefficient lead to small spheroid volumes, in which the bacterial vol-  
 372 ume is small if compared to the TC volume. As the value for  $\chi$  increases,  
 373 larger spheroids are formed, with a significant fraction of bacteria in their  
 374 volume. In all the cases for which chemotaxis is present the volume of ex-  
 375 tracellular material is greater than for the case of no-chemotaxis, indicating  
 376 that bacteria compete for the space of both extracellular material and TCs.

### 377 3.3.2. Effects of killing rate on spheroid growth after bacterial administration

378 Figure 7A shows the growth curves of spheroids infiltrated by bacteria  
 379 characterized by different killing rates. For these simulations we allowed the  
 380 bacteria to colonize the spheroid by selecting an intermediate chemotactic co-  
 381 efficient ( $\chi = 0.43 \text{ mm}^2\text{d}^{-1}$ ). By increasing the cell killing rate the spheroids  
 382 reach decreasing saturation radii. For the highest value of the killing rate the  
 383 spheroid size shows a damped oscillation that dies out approaching the end of  
 384 the simulation. In Figure 7B, we analyze the effects of TC proliferation rate  
 385 and bacterial killing rate on the number of sign changes in spheroid radial  
 386 velocity (i.e.  $dR/dt$ ) after bacterial administration. This quantity is corre-  
 387 lated to the frequency of the damped oscillations that occur after bacteria are  
 388 added to the culture medium. No oscillations are present for low proliferation  
 389 and killing rates. For increasing  $\gamma_c$  and  $\kappa$ , however, the oscillation frequency  
 390 increases. As in the previous section, we analyze the behavior of the model  
 391 components at different time points after the bacterial administration, i.e.

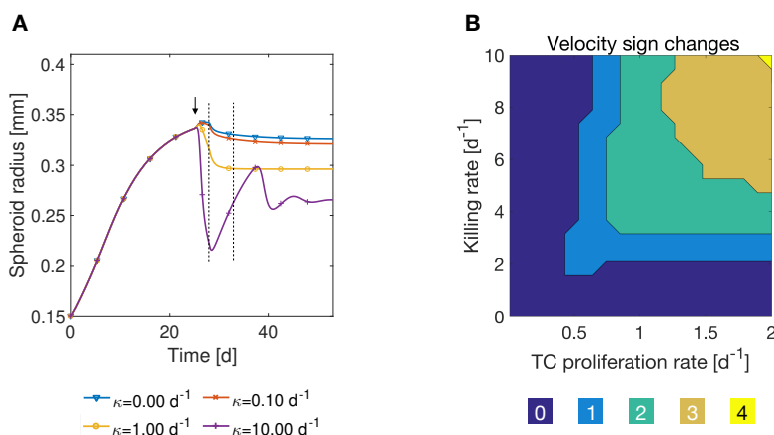

Figure 7: **A** Influence of cell killing rate on tumor spheroid growth curves after bacterial administration. The black arrow indicates the time of bacterial administration, whereas the dashed lines highlight the observation time points in the following plots. The final spheroid radius decreases with increasing cell killing rates. The highest killing rate ( $\kappa = 10 \text{ d}^{-1}$ ) gives rise to oscillations of the spheroid size, which die out at longer times. **B** Number of sign changes in spheroid radial velocity after administration, corresponding to the frequency of the oscillations in spheroid radius. The number of sign changes increases with increasing TC proliferation rate and killing rate.

392 at day 28, 33 (dashed lines in Figure 7) and 53 (end of the simulation).

393 Figure 8 provides an account of the variation of the volume fractions (of  
 394 TCs and bacteria) and the nutrient concentration over the spheroid radius  
 395 at the three observation times. Right after bacterial administration (day 28)  
 396 the TC volume fractions are similar between the different conditions, with  
 397 the exception of the highest killing rate case ( $\kappa = 10 \text{ d}^{-1}$ ). This condition  
 398 leads to the smallest spheroid, characterized by the highest TC volume frac-  
 399 tion (Figure 8A). At longer times after administration the differences in TC  
 400 volume fraction between the various killing ratios reduce (Figures 8D,G),  
 401 albeit the higher volume fractions are still obtained for the higher values of  
 402  $\kappa$ . The bacterial volume fraction shows a gradual decrease from higher values  
 403 after administration to lower values at later time points (Figures 8B,E,H).  
 404 A different scenario occurs for the highest killing rate case, for which the  
 405 bacterial population oscillates. Starting from an observable volume fraction  
 406 at day 28 (Figure 8B) bacteria have almost disappeared from the spheroid  
 407 at day 33 (Figure 8E). However, at day 53 a non-zero bacterial population  
 408 is still visible in Figure 8H; as the administration phase was concluded at

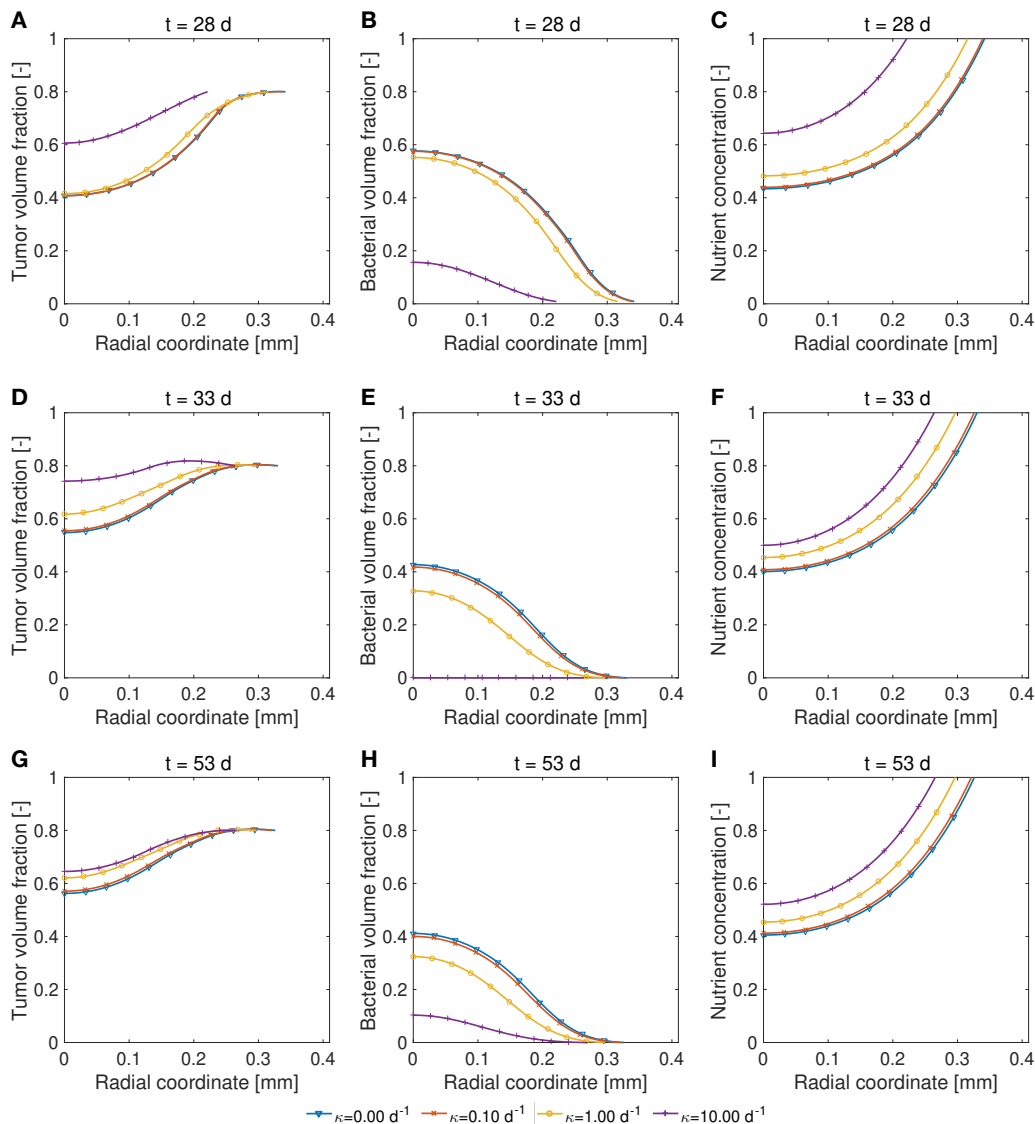

Figure 8: Plots for the volume fractions (TCs and bacteria) and nutrient concentration over the spheroid radius at different observation time points after bacterial administration. Different cell killing rates are considered. TCs: **A, D, G**; bacteria: **B, E, H**; nutrient: **C, F, I**. Increasing the killing rate leads to smaller spheroids with higher TC volume fractions in the core. Bacterial volume fractions are lower over the spheroid radius for larger values of  $\kappa$ , whereas the opposite occurs for nutrient concentration.

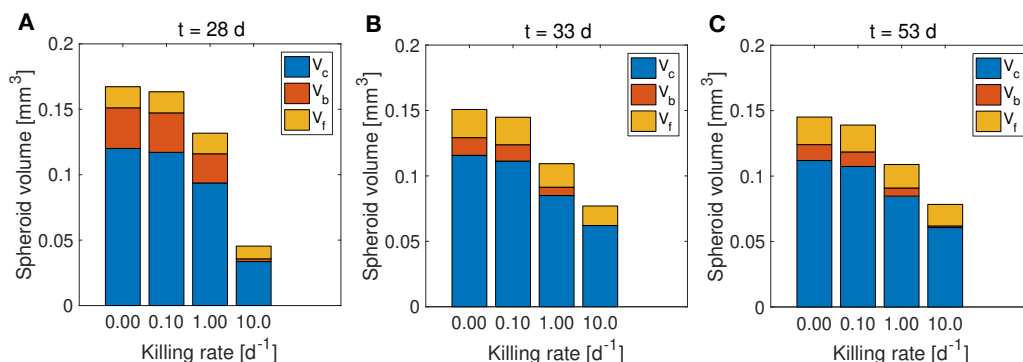

Figure 9: Composition of the spheroid volume at day 28 (A), 33 (B) and 53 (C) for different cell killing rates  $\kappa$  in the case of bacterial administration. The overall spheroid volume decreases with increasing cell killing rates. This also occurs for both TC ( $V_c$ ) and bacteria ( $V_b$ ) volumes, the latter showing a larger reduction with increasing values of  $\kappa$ .

409 day 28 and there are no bacteria in the culture medium, this volume fraction  
 410 derives from regrowth of the surviving bacteria. The volume of bacteria,  
 411 indeed, decreases at the end of bacteria administration and then increases  
 412 again over time (Figure S1). Regarding the nutrient concentration, hypoxic  
 413 regions are present in the spheroid at all the observation points for almost  
 414 all the killing ratios (Figures 8C,F,I). Again, this does not occur for the case  
 415 with the highest killing ratio at day 28 (Figure 8C), for which the nutrient  
 416 level is above the critical threshold. At later times (Figures 8F,I) hypoxic  
 417 regions appear also for this case, although of minor extension if compared to  
 418 the other conditions.

419 The contribution of TCs, bacteria and extracellular material to the spheroid  
 420 volume at the three observation points is shown in Figure 9. Generally the  
 421 total volume of the spheroids decreases over time and for increasing values  
 422 of the killing rate  $\kappa$ . Both the fractions of spheroid volume occupied by TCs  
 423 and bacteria decrease with increasing  $\kappa$ , however the reduction for bacterial  
 424 cells is more evident. For the highest value of  $\kappa$  the TC volume grows from  
 425 day 28 to day 33 (Figures 9B,C) and then stabilizes at day 53 (Figure 9C)  
 426 as a consequence of the oscillations in spheroid radius observed in Figure 7.

#### 427 4. Discussion

428 We have adapted a continuum model for macrophage-mediated tumor  
 429 treatment originally developed by Boemo and Byrne (2019) to study the

430 influence of bacteria on avascular tumor growth. We considered anaerobic  
431 bacteria which thrive in hypoxic environments and actively migrate towards  
432 nutrient deprived regions in solid tumors. We applied the model to tumor  
433 spheroids and tested the impact of bacteria chemotaxis and killing rate on  
434 spheroid dynamics. In our analysis, we considered both continuous infusion  
435 and time-dependent administration of bacteria in the culture medium. We  
436 found that chemotaxis is necessary for successful tumor infiltration, as only  
437 for non-zero values of the chemotactic coefficient bacteria were able to col-  
438 onize the inner regions of the spheroid. Model results also showed that the  
439 best treatment effect in terms of minimum spheroid size is obtained at in-  
440 termediate values of the chemotactic coefficient, and that spheroid volume  
441 increases for increasing chemotaxis strength. Next, we considered the im-  
442 pact of the effective rate at which bacteria perform an anti-tumor activity on  
443 the cancer cells. As expected, increasing the killing rate at an intermediate  
444 chemotactic coefficient reduces the total spheroid size. However, the ratio  
445 between the fraction of spheroid volume occupied by bacteria to TCs also  
446 decreases, suggesting that bacteria are not able to support their own survival  
447 by exerting an anti-tumor activity on TCs. In the case of time-dependent ad-  
448 ministration of bacteria, the model predicted the onset of oscillations in the  
449 spheroid volume. These oscillations occur only for high TC proliferation and  
450 bacterial killing rates, with a frequency that increases for increasing values  
451 of the latter parameters.

452 For simplicity, we considered a general effective anti-tumor activity of  
453 TCs by bacteria without focusing on specific mechanisms, e.g. cytotoxic  
454 agents, prodrug-converting enzymes, etc. (Torres et al., 2018; Zhou et al.,  
455 2018; Kramer et al., 2018). Such treatment modalities could be incorpo-  
456 rated by extending the model, to provide a more accurate description of the  
457 therapeutic action. Moreover, we focused on tumor spheroids, an *in vitro*  
458 approximation of avascular tumors. As such, they lack all the interactions  
459 between the tumor and its immune environment. Including the cross-talk  
460 between bacteria and the components of the immune system would be a  
461 fundamental step to address questions coming from *in vivo* tumors. We  
462 modeled the mechanical response of cells and bacteria in the simplest way,  
463 considering the phases as inviscid fluids. Although this description is still  
464 able to qualitatively describe the experimental results, more detailed consti-  
465 tutive assumptions for the mechanical behavior of the phases would lead to  
466 new insights into the interactions between bacteria and TCs in the aggregate  
467 (Sciumè et al., 2013; Giverso et al., 2015; Ambrosi et al., 2017; Mascheroni

468 et al., 2018; Fraldi and Carotenuto, 2018; Giverso and Preziosi, 2019). We  
469 also considered ideal spherical spheroids to reduce the mathematical prob-  
470 lem to one dimension. Even if the qualitative results will be maintained in a  
471 three-dimensional geometry, adopting the latter will be crucial to translate  
472 the model to *in vivo* situations.

473 In this modeling approach, space competition between bacteria and tumor  
474 cells arises naturally from the conservation of mass and momentum imposed  
475 by the governing equations. As no void regions are allowed into the spheroid,  
476 when cells move or die one of the model components automatically fills the  
477 space. At intermediate chemotaxis levels, bacteria and TCs compete for  
478 space in the spheroid core and the expansion of TCs becomes limited. In  
479 this condition, indeed, we find the lowest fractions of TCs and bacteria in the  
480 spheroid volume. On the other hand, for increasing values of the chemotactic  
481 coefficient, bacteria localize predominantly in the spheroid core and displace  
482 TCs to the outer region of the spheroid. Both types of cell can proliferate  
483 in each of the two spheroid areas (hypoxic for spheroids, well-oxygenated for  
484 TCs), giving rise to high fractions of TCs and bacteria in the overall spheroid  
485 volume. As a matter of fact, chemotaxis could be a target for bacteria-based  
486 anticancer therapies. This mechanism arises as a pure physical effect from  
487 the competition for space and nutrients between cancer and bacteria cells and  
488 could be optimized to obtain the highest tumor volume reduction. Currently,  
489 even though researchers are aware of the benefits coming from active bacteria  
490 migration towards hypoxic regions in tumors (Forbes, 2010; Kramer et al.,  
491 2018), this knowledge has not been efficiently exploited in the clinical trials  
492 carried out so far (Torres et al., 2018).

493 Since bacteria thrive in hypoxic conditions, removal of TCs improves  
494 oxygenation of the spheroid, which leads to less favourable conditions for  
495 bacterial cells. Better oxygenation of the spheroids could also be exploited  
496 to improve the sensitivity of cancer cells to standard chemotherapies, in the  
497 context of synergistic treatments (Zhou et al., 2018). In (Owen et al., 2004),  
498 the authors noted a similar effect when modeling macrophages in spheroids,  
499 another example showing that mathematical models could help identifying  
500 situations when TC sensitization to therapies might be possible - see also  
501 (Kim et al., 2013; Michor and Beal, 2015; Mascheroni et al., 2017).

502 Finally, we point out two straightforward developments that emerge from  
503 the findings of this work. First, one could think about extending the model  
504 to consider different bacterial administration schedules. The duration of  
505 bacteria administration, the time of administration and single vs. multiple

506 dosing could be investigated to determine the optimal conditions for this  
507 kind of treatment. Secondly, the tight coupling between the dynamics of  
508 TCs and bacteria in terms of regulating their reciprocal environment could be  
509 addressed via mathematical models, in order to control the bacterial infection  
510 or identify the optimal timing of the therapy.

## 511 **Acknowledgements**

512 M.M.H. and H.H. gratefully acknowledge the funding support of the  
513 Helmholtz Association of German Research Centers - Initiative and Network-  
514 ing Fund for the project on Reduced Complexity Models (ZT-I-0010). H.H.  
515 and P.M. acknowledge the funding support of MicMode-I2T (01ZX1710B)  
516 by the Federal Ministry of Education and Research (BMBF).

## 517 **References**

- 518 Agosti, A., Cattaneo, C., Giverso, C., Ambrosi, D., Ciarletta, P., 2018.  
519 A computational framework for the personalized clinical treatment of  
520 glioblastoma multiforme. *ZAMM-Journal of Applied Mathematics and Me-*  
521 *chanics/Zeitschrift für Angewandte Mathematik und Mechanik* 98 (12),  
522 2307–2327.
- 523 Alfonso, J., Köhn-Luque, A., Stylianopoulos, T., Feuerhake, F., Deutsch, A.,  
524 Hatzikirou, H., 2016. Why one-size-fits-all vaso-modulatory interventions  
525 fail to control glioma invasion: in silico insights. *Scientific reports* 6, 37283.
- 526 Altrock, P. M., Liu, L. L., Michor, F., 2015. The mathematics of cancer:  
527 integrating quantitative models. *Nature Reviews Cancer* 15 (12), 730.
- 528 Ambrosi, D., Mollica, F., 2004. The role of stress in the growth of a multicell  
529 spheroid. *Journal of mathematical biology* 48 (5), 477–499.
- 530 Ambrosi, D., Pezzuto, S., Riccobelli, D., Stylianopoulos, T., Ciarletta, P.,  
531 2017. Solid tumors are poroelastic solids with a chemo-mechanical feedback  
532 on growth. *Journal of Elasticity* 129 (1-2), 107–124.
- 533 Ambrosi, D., Preziosi, L., 2002. On the closure of mass balance models for  
534 tumor growth. *Mathematical Models and Methods in Applied Sciences*  
535 12 (05), 737–754.



- 536 Boemo, M. A., Byrne, H. M., 2019. Mathematical modelling of a hypoxia-  
537 regulated oncolytic virus delivered by tumour-associated macrophages.  
538 *Journal of Theoretical Biology* 461, 102–116.
- 539 Breward, C., Byrne, H., Lewis, C., 2001. Modelling the interactions between  
540 tumour cells and a blood vessel in a microenvironment within a vascular  
541 tumour. *European Journal of Applied Mathematics* 12 (5), 529–556.
- 542 Breward, C., Byrne, H., Lewis, C., 2002. The role of cell-cell interactions in  
543 a two-phase model for avascular tumour growth. *Journal of Mathematical*  
544 *Biology* 45 (2), 125–152.
- 545 Breward, C. J., Byrne, H. M., Lewis, C. E., 2003. A multiphase model de-  
546 scribing vascular tumour growth. *Bulletin of mathematical biology* 65 (4),  
547 609–640.
- 548 Byrne, H., 2012. *Mathematics and life sciences*.
- 549 Byrne, H., Preziosi, L., 2003. Modelling solid tumour growth using the theory  
550 of mixtures. *Mathematical medicine and biology: a journal of the IMA*  
551 20 (4), 341–366.
- 552 Byrne, H. M., 2010. Dissecting cancer through mathematics: from the cell  
553 to the animal model. *Nature Reviews Cancer* 10 (3), 221.
- 554 Carmeliet, P., Jain, R. K., 2000. Angiogenesis in cancer and other diseases.  
555 *nature* 407 (6801), 249.
- 556 Challapalli, A., Carroll, L., Aboagye, E. O., 2017. Molecular mechanisms of  
557 hypoxia in cancer. *Clinical and translational imaging* 5 (3), 225–253.
- 558 Chaplain, M. A., Graziano, L., Preziosi, L., 2006. Mathematical modelling of  
559 the loss of tissue compression responsiveness and its role in solid tumour  
560 development. *Mathematical medicine and biology: a journal of the IMA*  
561 23 (3), 197–229.
- 562 Colombo, M. C., Giverso, C., Faggiano, E., Boffano, C., Acerbi, F., Ciarletta,  
563 P., 2015. Towards the personalized treatment of glioblastoma: integrating  
564 patient-specific clinical data in a continuous mechanical model. *PLoS One*  
565 10 (7), e0132887.

- 566 Conger, A. D., Ziskin, M. C., 1983. Growth of mammalian multicellular  
567 tumor spheroids. *Cancer Research* 43 (2), 556–560.
- 568 Folkman, J., 1971. Tumor angiogenesis: therapeutic implications. *New eng-  
569 land journal of medicine* 285 (21), 1182–1186.
- 570 Forbes, N. S., 2010. Engineering the perfect (bacterial) cancer therapy. *Na-  
571 ture Reviews Cancer* 10 (11), 785.
- 572 Ford, R. M., Phillips, B. R., Quinn, J. A., Lauffenburger, D. A., 1991.  
573 Measurement of bacterial random motility and chemotaxis coefficients: I.  
574 stopped-flow diffusion chamber assay. *Biotechnology and bioengineering*  
575 37 (7), 647–660.
- 576 Fraldi, M., Carotenuto, A. R., 2018. Cells competition in tumor growth  
577 poroelasticity. *Journal of the Mechanics and Physics of Solids* 112, 345–367.
- 578 Gerlee, P., Anderson, A. R., 2007. An evolutionary hybrid cellular automaton  
579 model of solid tumour growth. *Journal of theoretical biology* 246 (4), 583–  
580 603.
- 581 Gibson, B., Wilson, D. J., Feil, E., Eyre-Walker, A., 2018. The distribution  
582 of bacterial doubling times in the wild. *Proceedings of the Royal Society*  
583 *B: Biological Sciences* 285 (1880), 20180789.
- 584 Giverso, C., Preziosi, L., 2019. Influence of the mechanical properties of the  
585 necrotic core on the growth and remodelling of tumour spheroids. *Interna-  
586 tional Journal of Non-Linear Mechanics* 108, 20–32.
- 587 Giverso, C., Scianna, M., Grillo, A., 2015. Growing avascular tumours as  
588 elasto-plastic bodies by the theory of evolving natural configurations. *Me-  
589 chanics Research Communications* 68, 31–39.
- 590 Grimes, D. R., Kelly, C., Bloch, K., Partridge, M., 2014. A method for  
591 estimating the oxygen consumption rate in multicellular tumour spheroids.  
592 *Journal of The Royal Society Interface* 11 (92), 20131124.
- 593 Hanahan, D., Weinberg, R. A., 2011. Hallmarks of cancer: the next genera-  
594 tion. *cell* 144 (5), 646–674.

- 595 Hatzikirou, H., Alfonso, J. C. L., Leschner, S., Weiss, S., Meyer-Hermann,  
596 M., 2017. Therapeutic potential of bacteria against solid tumors. *Cancer*  
597 *research* 77 (7), 1553–1563.
- 598 Jean, A. T. S., Swofford, C. A., Panteli, J. T., Brentzel, Z. J., Forbes, N. S.,  
599 2014. Bacterial delivery of staphylococcus aureus  $\alpha$ -hemolysin causes re-  
600 gression and necrosis in murine tumors. *Molecular Therapy* 22 (7), 1266–  
601 1274.
- 602 Kasinskas, R. W., Forbes, N. S., 2006. Salmonella typhimurium specifically  
603 chemotax and proliferate in heterogeneous tumor tissue in vitro. *Biotech-*  
604 *nology and bioengineering* 94 (4), 710–721.
- 605 Kim, M., Gillies, R. J., Rejniak, K. A., 2013. Current advances in mathemat-  
606 ical modeling of anti-cancer drug penetration into tumor tissues. *Frontiers*  
607 *in oncology* 3, 278.
- 608 Kolokotroni, E. A., Dionysiou, D. D., Uzunoglu, N. K., Stamatakos, G. S.,  
609 2011. Studying the growth kinetics of untreated clinical tumors by us-  
610 ing an advanced discrete simulation model. *Mathematical and Computer*  
611 *Modelling* 54 (9-10), 1989–2006.
- 612 Kramer, M. G., Masner, M., Ferreira, F. A., Hoffman, R. M., 2018. Bacterial  
613 therapy of cancer: Promises, limitations, and insights for future directions.  
614 *Frontiers in Microbiology* 9, 16.
- 615 Landry, J., Freyer, J., Sutherland, R., 1982. A model for the growth of mul-  
616 ticellular spheroids. *Cell Proliferation* 15 (6), 585–594.
- 617 Lewus, P., Ford, R. M., 2001. Quantification of random motility and chemo-  
618 taxis bacterial transport coefficients using individual-cell and population-  
619 scale assays. *Biotechnology and bioengineering* 75 (3), 292–304.
- 620 Martínez-González, A., Calvo, G. F., Romasanta, L. A. P., Pérez-García,  
621 V. M., 2012. Hypoxic cell waves around necrotic cores in glioblastoma: a  
622 biomathematical model and its therapeutic implications. *Bulletin of math-*  
623 *ematical biology* 74 (12), 2875–2896.
- 624 Mascheroni, P., Boso, D., Preziosi, L., Schrefler, B. A., 2017. Evaluating the  
625 influence of mechanical stress on anticancer treatments through a multi-  
626 phase porous media model. *Journal of theoretical biology* 421, 179–188.

- 627 Mascheroni, P., Carfagna, M., Grillo, A., Boso, D., Schrefler, B., 2018.  
628 An avascular tumor growth model based on porous media mechanics and  
629 evolving natural states. *Mathematics and Mechanics of Solids* 23 (4), 686–  
630 712.
- 631 Mascheroni, P., Stigliano, C., Carfagna, M., Boso, D. P., Preziosi, L., De-  
632 cuzzi, P., Schrefler, B. A., 2016. Predicting the growth of glioblastoma  
633 multiforme spheroids using a multiphase porous media model. *Biomechanics and modeling in mechanobiology* 15 (5), 1215–1228.
- 635 Matzavinos, A., Kao, C.-Y., Green, J. E. F., Sutradhar, A., Miller, M.,  
636 Friedman, A., 2009. Modeling oxygen transport in surgical tissue transfer.  
637 *Proceedings of the National Academy of Sciences* 106 (29), 12091–12096.
- 638 Michor, F., Beal, K., 2015. Improving cancer treatment via mathematical  
639 modeling: surmounting the challenges is worth the effort. *Cell* 163 (5),  
640 1059–1063.
- 641 Montel, F., Delarue, M., Elgeti, J., Malaquin, L., Basan, M., Risler, T.,  
642 Cabane, B., Vignjevic, D., Prost, J., Cappello, G., et al., 2011. Stress  
643 clamp experiments on multicellular tumor spheroids. *Physical review letters*  
644 107 (18), 188102.
- 645 Osswald, A., Sun, Z., Grimm, V., Ampem, G., Riegel, K., Westendorf,  
646 A. M., Sommergruber, W., Otte, K., Dürre, P., Riedel, C. U., 2015. Three-  
647 dimensional tumor spheroids for in vitro analysis of bacteria as gene de-  
648 livery vectors in tumor therapy. *Microbial cell factories* 14 (1), 199.
- 649 Owen, M. R., Byrne, H. M., Lewis, C. E., 2004. Mathematical modelling of  
650 the use of macrophages as vehicles for drug delivery to hypoxic tumour  
651 sites. *Journal of theoretical biology* 226 (4), 377–391.
- 652 Pesavento, F., Schrefler, B. A., Sciumè, G., 2017. Multiphase flow in de-  
653 forming porous media: a review. *Archives of Computational Methods in*  
654 *Engineering* 24 (2), 423–448.
- 655 Phaiboun, A., Zhang, Y., Park, B., Kim, M., 2015. Survival kinetics of starv-  
656 ing bacteria is biphasic and density-dependent. *PLoS computational biol-*  
657 *ogy* 11 (4), e1004198.
- 658 Preziosi, L., 2003. *Cancer modelling and simulation*. CRC Press.

- 659 Preziosi, L., Tosin, A., 2009. Multiphase modelling of tumour growth and ex-  
660 tracellular matrix interaction: mathematical tools and applications. Jour-  
661 nal of mathematical biology 58 (4-5), 625.
- 662 Sarkar, S., Peng, C.-C., Kuo, C. W., Chueh, D.-Y., Wu, H.-M., Liu, Y.-H.,  
663 Chen, P., Tung, Y.-C., 2018. Study of oxygen tension variation within live  
664 tumor spheroids using microfluidic devices and multi-photon laser scanning  
665 microscopy. RSC Advances 8 (53), 30320–30329.
- 666 Schaller, G., Meyer-Hermann, M., 2005. Multicellular tumor spheroid in an  
667 off-lattice voronoi-delaunay cell model. Physical Review E 71 (5), 051910.
- 668 Sciumè, G., Shelton, S., Gray, W. G., Miller, C. T., Hussain, F., Ferrari, M.,  
669 Decuzzi, P., Schrefler, B., 2013. A multiphase model for three-dimensional  
670 tumor growth. New journal of physics 15 (1), 015005.
- 671 Siddique, J., Ahmed, A., Aziz, A., Khalique, C., 2017. A review of mixture  
672 theory for deformable porous media and applications. Applied Sciences  
673 7 (9), 917.
- 674 Suh, S., Leaman, E., Zhan, Y., Behkam, B., 2018. Mathematical modeling of  
675 bacteria-enabled drug delivery system penetration into multicellular tumor  
676 spheroids. In: 2018 40th Annual International Conference of the IEEE  
677 Engineering in Medicine and Biology Society (EMBC). IEEE, pp. 6162–  
678 6165.
- 679 Sutherland, R. M., 1988. Cell and environment interactions in tumor mi-  
680 croregions: the multicell spheroid model. Science 240 (4849), 177–184.
- 681 Toley, B. J., Forbes, N. S., 2011. Motility is critical for effective distribution  
682 and accumulation of bacteria in tumor tissue. Integrative Biology 4 (2),  
683 165–176.
- 684 Torres, W., Lamed, V., Olivar, L. C., Navarro, C., Fuenmayor, J., Pérez, A.,  
685 Mindiola, A., Rojas, M., Martínez, M. S., Velasco, M., et al., 2018. Bacteria  
686 in cancer therapy: beyond immunostimulation. J Cancer Metastasis Treat  
687 4, 4.
- 688 Vaupel, P., Mayer, A., 2007. Hypoxia in cancer: significance and impact on  
689 clinical outcome. Cancer and Metastasis Reviews 26 (2), 225–239.

- 690 Vinci, M., Gowan, S., Boxall, F., Patterson, L., Zimmermann, M., Lomas,  
691 C., Mendiola, M., Hardisson, D., Eccles, S. A., et al., 2012. Advances  
692 in establishment and analysis of three-dimensional tumor spheroid-based  
693 functional assays for target validation and drug evaluation. *BMC biology*  
694 10 (1), 29.
- 695 Ward, J., King, J., 1999. Mathematical modelling of avascular-tumour  
696 growth ii: modelling growth saturation. *Mathematical Medicine and Biol-*  
697 *ogy: A Journal of the IMA* 16 (2), 171–211.
- 698 Wilson, W. R., Hay, M. P., 2011. Targeting hypoxia in cancer therapy. *Nature*  
699 *Reviews Cancer* 11 (6), 393.
- 700 Zhou, S., Gravekamp, C., Bermudes, D., Liu, K., 2018. Tumour-targeting  
701 bacteria engineered to fight cancer. *Nature Reviews Cancer*, 1.
